# Supplementary material for: Mechano-responsive calix[4]arene-based molecular gels: agitation induced gelation and hardening
Source: Royal Society of Chemistry journal article supplement (doi:10.1039/c3sm50577d), 2013-01-01
Supplement: c3sm50577d.pdf [file c3sm50577d.pdf]

# Supporting Information

*for*

## **Mechano-responsive Calix[4]arene-based Molecular Gels: Agitation Induced Gelation and Hardening**

Xiuqin Cai<sup>a,b</sup>, Ying Wu<sup>a</sup>, Liya Wang<sup>a</sup>, Ni Yan<sup>a</sup>, Jing Liu<sup>a</sup>, Xiaohua Fang<sup>a</sup> and Yu Fang<sup>\*a</sup>

*<sup>a</sup>Key Laboratory of Applied Surface and Colloid Chemistry of Ministry of Education, School of Chemistry and Chemical Engineering, Shaanxi Normal University, Xi'an, Shaanxi 710062, P. R. China.*

*<sup>b</sup> College of Chemistry and Life Science, Weinan Normal University, Weinan, Shaanxi 714000, P. R. China*

E-mail: yfang@snnu.edu.cn

## 1. Synthetic procedures

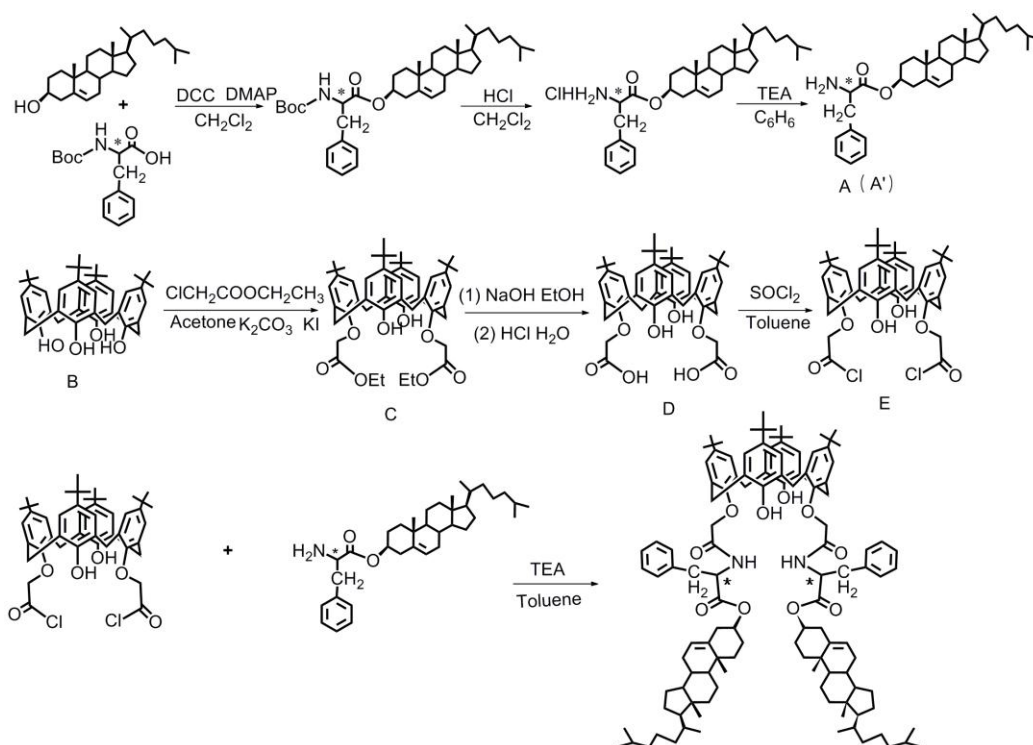

**Scheme S1.** Synthesis routes of the cholesteryl derivatives of calix[4]arene with L- or D-phenylalanine in the linkers (**1** and **2**). With the exception of A, the others including calix[4]arene are the intermediates **B**, **C**, **D** and **E**.

## 2. Gelation behaviors of the two compounds

**Table S1.** Gelation behaviors of **1** and **2** (2.5%, w/v)

| <b>Solvent</b>     | <b>1</b> | <b>2</b> | <b>Solvent</b>    | <b>1</b> | <b>2</b> |
|--------------------|----------|----------|-------------------|----------|----------|
| Methanol           | I        | I        | <i>n</i> -Hexane  | P        | S        |
| Ethanol            | I        | I        | <i>n</i> -Heptane | P        | S        |
| <i>n</i> -Propanol | PG       | S        | <i>n</i> -Octane  | P        | S        |
| <i>n</i> -Butanol  | G        | S        | <i>n</i> -Nonane  | P        | S        |
| <i>n</i> -Pentanol | G        | S        | <i>n</i> -Decane  | P        | S        |
| <i>n</i> -Hexanol  | PG       | S        | Cyclohexane       | S        | S        |
| <i>n</i> -Heptanol | S        | S        | Acetonitrile      | I        | I        |
| <i>n</i> -Octanol  | S        | S        | Isopropanol       | P        | G        |
| <i>n</i> -Nonanol  | S        | S        | Kerosene          | S        | S        |
| <i>n</i> -Decanol  | S        | S        | Ethyl acetate     | S        | S        |
| Acetone            | I        | S        | DMSO              | P        | P        |
| Benzene            | S        | S        | DMF               | S        | S        |
| Toluene            | S        | S        | CHCl <sub>2</sub> | S        | S        |
| THF                | S        | S        | CHCl <sub>3</sub> | S        | S        |
| <i>n</i> -Pentane  | P        | I        | CCl <sub>4</sub>  | S        | S        |

### 3. Concentration dependence of the gel-networks of 1/*n*-pentanol

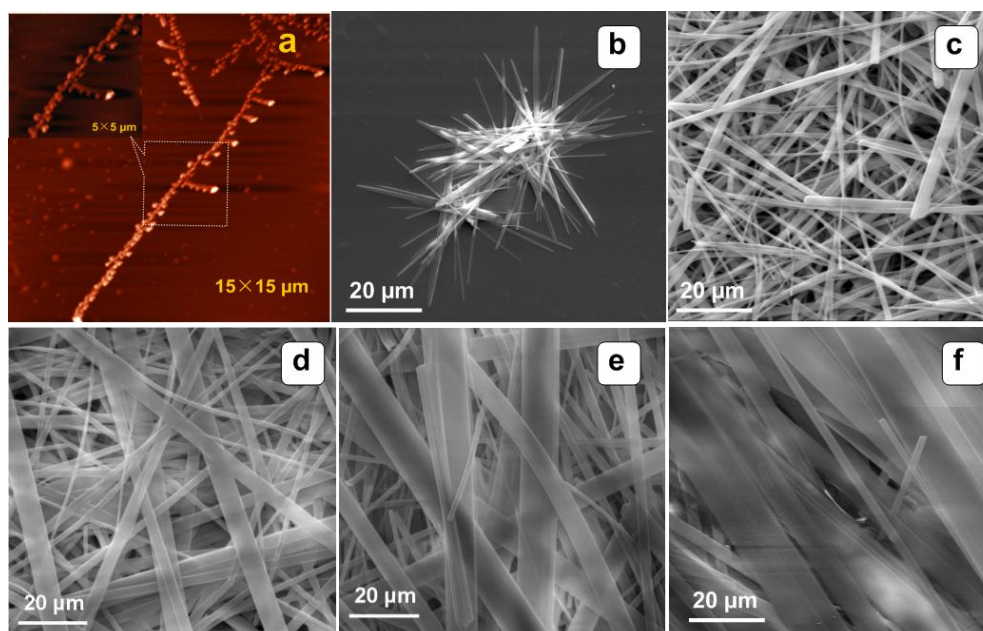

**Figure S2** AFM (a) and SEM (b-f) images of the aggregates of **1** in its *n*-pentanol gel (a, 0.01%; b, 0.1%; c, 0.5%; d, 1%; e, 1.5%; f, 2%, w/v)

#### 4. Sonication time-dependence of the gel-networks of 2/isopropanol

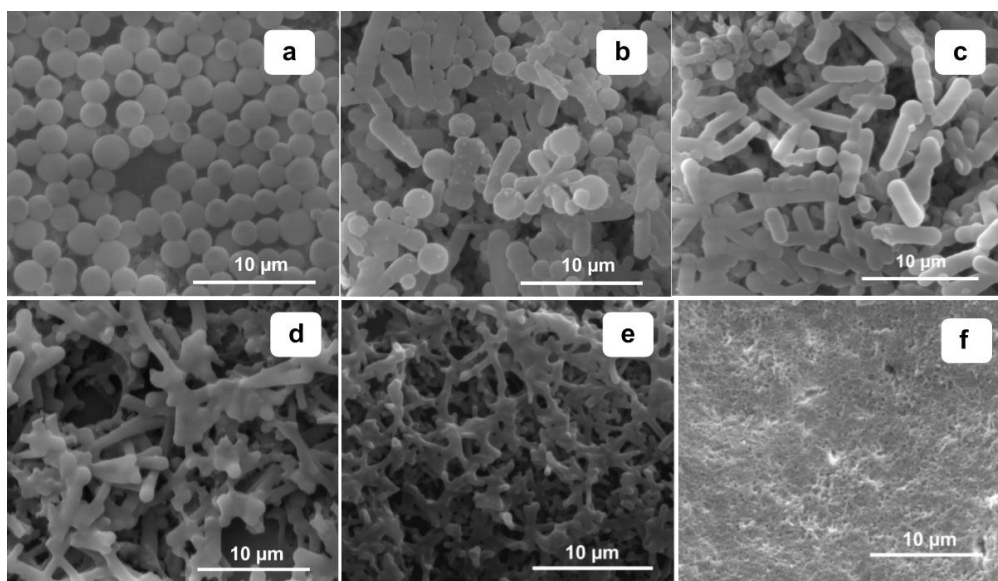

**Figure S3** The SEM images of the xerogels obtained from the 2/isopropanol gels prepared with different sonication time at room temperature ( a, 3 min; b, 6 min; c, 9 min; d, 12 min; e, 15 min; f, 36 min)

#### 4. Gel networks of the gel formed after 30 h after dissolution of **1** in the solvent (2.5%, w/v) via heating

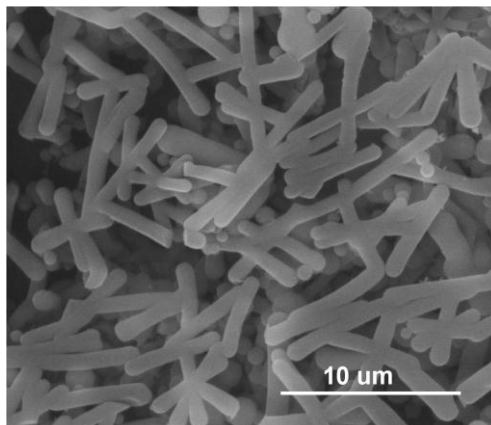

**Figure S4** SEM image of the aggregates in the xerogel of **2** obtained from its isopropanol gel which was prepared by dissolving **2** in isopropanol (2.5%, w/v) via heating. However, it is to be noted that the gel can be only obtained 30 h later of the dissolution. Even so, a very small or light shaking is needed to make the system (a very viscous solution) become a gel.

## 5. $^1\text{H}$ NMR spectra of **1**

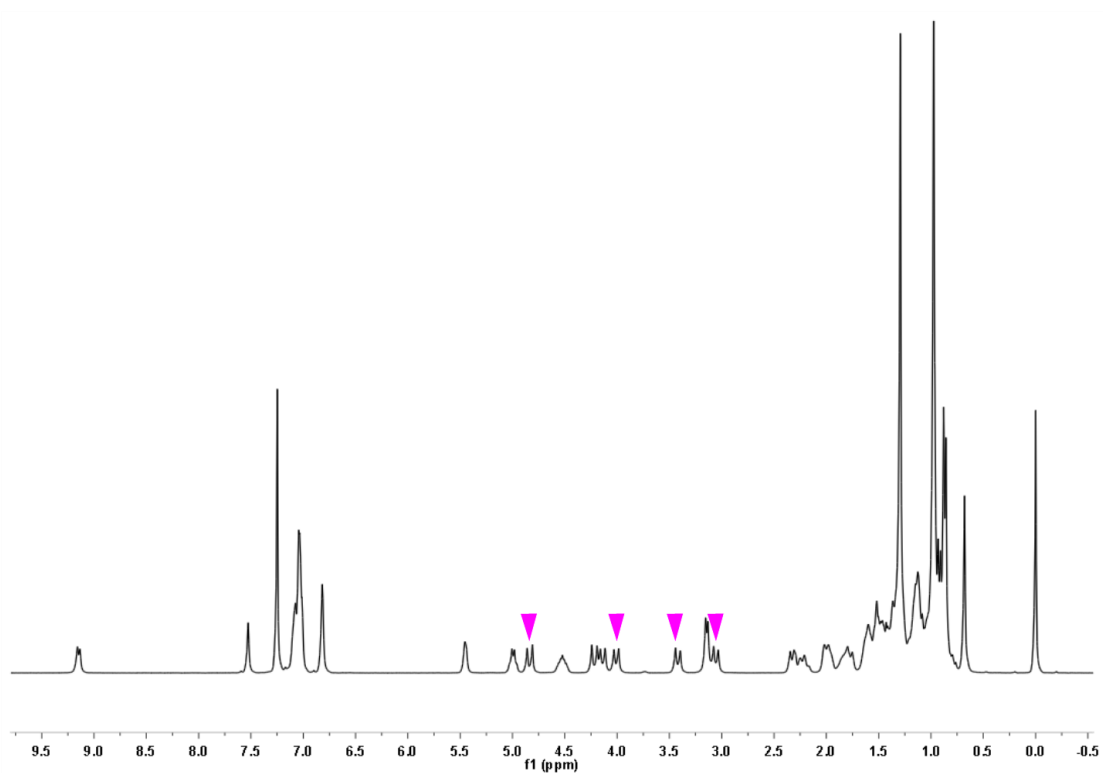

**Figure S5**  $^1\text{H}$  NMR spectra of **1** in  $\text{CDCl}_3$
